# Supplementary material for: Adverse effect profile comparison of pain regimens with and without intravenous acetaminophen in total hip and knee arthroplasty patients
Source: PubMed Central journal article supplement — SAGE Open Med. 2017 Mar 17;5:2050312117699146. doi: 10.1177/2050312117699146 (PMC5415288; doi:10.1177/2050312117699146), 2017-03-17
Supplement: SupplementaryMaterial.pdf [file SupplementaryMaterial.pdf]

**Supplementary- Figure 1.** The figure shows the breakdown of patients included and excluded from the study.

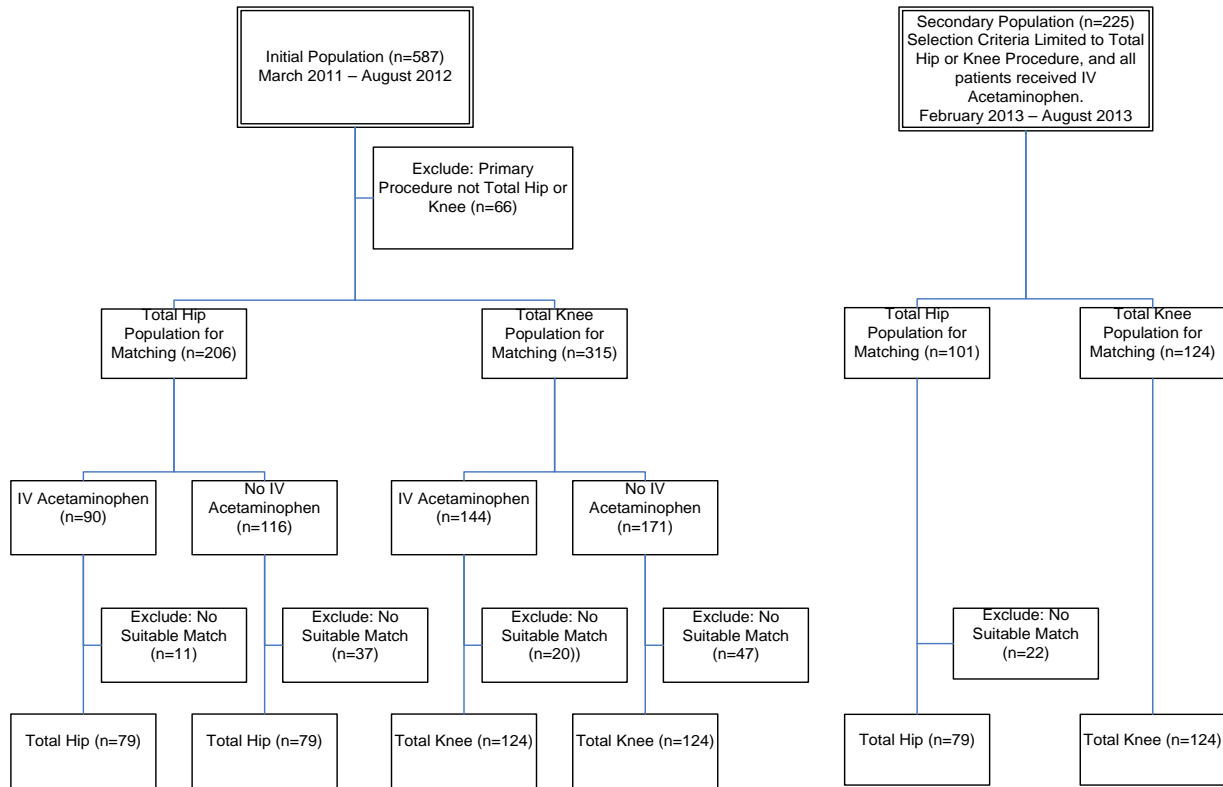

**Table 1S. Nonopioid Pain Medication Use**

| <b>Medication, n (%)</b>               | <b>IVA</b> | <b>Non-IVA</b> | <b>P Value</b> |
|----------------------------------------|------------|----------------|----------------|
| <b>Acetaminophen</b>                   |            |                |                |
| Oral                                   | 152 (37.4) | 200 (98.5)     | <0.0001        |
| Oral, mean, mg (cumulative)            | 1023       | 7260           | <0.0001        |
| <b>Non-steroidal anti-inflammatory</b> |            |                |                |
| Celecoxib                              | 298 (73.4) | 157 (77.3)     | 0.32           |
| Diclofenac                             | 1 (0.2)    | 0              | 1              |
| Diclofenac topical                     | 1 (0.2)    | 0              | 1              |
| Ibuprofen                              | 2 (0.5)    | 0              | 1              |
| Meloxicam                              | 1 (0.2)    | 1 (0.5)        | 1              |
| Naproxen                               | 1 (0.2)    | 0              | 1              |
| <b>Nerve acting agents</b>             |            |                |                |
| Amitriptyline                          | 0          | 1 (0.5)        | 1              |
| Duloxetine                             | 15 (3.7)   | 4 (2)          | 0.32           |
| Gabapentin                             | 14 (3.4)   | 6 (3)          | 0.81           |
| Nortriptyline                          | 2 (0.5)    | 0              | 1              |
| Pregabalin                             | 368 (90.6) | 62 (30.5)      | <0.0001        |
| <b>Anesthetic/ Nerve block</b>         |            |                |                |
| Ketamine                               | 9 (2.2)    | 11 (5.4)       | 0.67           |
| Lidocaine                              | 1 (0.2)    | 1 (0.5)        | 0.55           |
| Lidocaine, topical                     | 3 (0.7)    | 1 (0.5)        | 0.31           |

|                        |            |            |         |
|------------------------|------------|------------|---------|
| Mepivacaine            | 1 (0.2)    | 0          | 0.04    |
| <b>Muscle Relaxant</b> |            |            |         |
| Baclofen               | 4 (1)      | 1 (0.5)    | 0.67    |
| Carisoprodol           | 2 (0.5)    | 5 (2.5)    | 0.04    |
| Cyclobenzapine         | 3 (0.7)    | 0          | 0.55    |
| Metaxolone             | 4 (1)      | 0          | 0.31    |
| <b>Anti-emetics</b>    |            |            |         |
| Meclizine              | 2 (0.5)    | 0          | 0.55    |
| Metoclopramide         | 5 (1.2)    | 3 (1.5)    | 1       |
| Ondansetron            | 292 (71.9) | 167 (82.2) | 0.0052  |
| Prochlorperazine       | 19 (4.7)   | 2 (1)      | <0.0001 |
| Promethazine           | 10 (2.5)   | 2 (1)      | 0.35    |
| Scopolamine            | 19 (4.7)   | 2 (1)      | 0.02    |
| Trimethobenzamide      | 4 (1)      | 2 (1)      | 1       |
| <b>Other</b>           |            |            |         |
| Dexamethasone          | 76 (18.7)  | 45 (22.2)  | 0.33    |
| Dexmedetomidine        | 2 (0.5)    | 2 (1)      | 0.60    |
| Hydrocortisone         | 4 (1)      | 1 (0.5)    | 0.67    |
| Methylprednisolone     | 2 (0.5)    | 0          | 1       |
| Prednisone             | 2 (0.5)    | 1 (0.5)    | 1       |
| Tramadol               | 4 (1)      | 0          | 0.31    |
| Triamcinolone          | 1 (0.2)    | 0          | 1       |
